# Supplementary material for: Performance of in silico prediction tools for the classification of rare BRCA1/2 missense variants in clinical diagnostics
Source: PubMed Central journal article supplement (PMC5870501; doi:10.1186/s12920-018-0353-y), 2018-03-27
Supplement: 12920_2018_353_MOESM3_ESM.pdf [file 12920_2018_353_MOESM3_ESM.pdf]

## Supplement S3: Evaluation studies for *in silico* prediction tools

|                             | Evaluation data                                                                                                         | Align-GVGD |           |      | SIFT      |           |           | MutationTaster2 |           |           | PolyPhen-2 |           |           | Remarks                                                                                          |
|-----------------------------|-------------------------------------------------------------------------------------------------------------------------|------------|-----------|------|-----------|-----------|-----------|-----------------|-----------|-----------|------------|-----------|-----------|--------------------------------------------------------------------------------------------------|
|                             |                                                                                                                         | SENS       | SPEC      | ACC  | SENS      | SPEC      | ACC       | SENS            | SPEC      | ACC       | SENS       | SPEC      | ACC       |                                                                                                  |
| Rodrigues et al., 2015 [1]  | 48 variants in <i>UGT1A1</i>                                                                                            | 0.65       | 0.67      | 0.65 | 0.92      | 0.80      | 0.80      |                 |           |           | 0.89       | 0.40      | 0.75      | with manually curated input alignment of 27 <i>UGT1A1</i> orthologs                              |
| Mueller et al., 2015 [2]    | 339 variants in 76 genes                                                                                                |            |           |      | 0.56      | 0.54      | 0.55      |                 |           |           | 0.48       | 0.69      | 0.60      |                                                                                                  |
| Luxembourg et al., 2014 [3] | 52 variants in <i>SERPINC1</i>                                                                                          |            |           |      | 0.80      | 0.67      | 0.79      |                 |           |           | 0.94       | 1.00      | 0.94      |                                                                                                  |
| Grimm et al., 2015 [4]      | 5 data sets with numbers of variants in range from 8850 to 47149                                                        |            |           |      | 0.62–0.79 | 0.62–0.80 | 0.64–0.79 | 0.74–0.93       | 0.51–0.85 | 0.60–0.88 | 0.65–0.83  | 0.62–0.81 | 0.63–0.82 |                                                                                                  |
| Choi et al., 2012 [5]       | 57646 human missense variants from UniProt                                                                              |            |           |      | 0.85      | 0.69      | 0.77*     |                 |           |           | 0.89       | 0.62      | 0.76*     | *balanced accuracy                                                                               |
| Leong et al., 2015 [6]      | 312 variants in <i>KCNQ1</i> , <i>KCNH2</i> and <i>SCN5A</i>                                                            |            |           |      | 0.82      | 0.77      | 0.81      |                 |           |           | 0.86       | 0.40      | 0.81      |                                                                                                  |
| Hicks et al., 2011 [7]      | 33 variants in <i>BRCA1</i> , 30 variants in <i>MSH2</i> , 60 variants in <i>MLH1</i> , and 144 variants in <i>TP53</i> | 0.00–0.97  | 0.52–1.00 |      | 0.32–0.95 | 0.18–1.00 |           |                 |           |           | 0.67–0.97  | 0.18–1.00 |           |                                                                                                  |
| Miosge et al., 2015 [8]     | 30 variants in 23 mouse immune genes                                                                                    |            |           |      | 1.00      | 0.58      | 0.63      |                 |           |           | 1.00       | 0.42      | 0.50      | nsSNPS were confirmed via <i>in vivo</i> tests for loss of function phenotypes                   |
| Kerr et al., 2017 [9]       | 1118 missense variants from the Myriad Genetic Laboratories, Inc. database                                              | 0.84       | 0.92      | 0.91 | 0.99      | 0.56      | 0.60      |                 |           |           | 0.81       | 0.70      | 0.71      | 750 variants were excluded from Align-GVGD evaluation as they were already used for its training |

## References

- [1] Rodrigues, C., Santos-Silva, A., Costa, E., Bronze-da-Rocha, E.: Performance of In Silico Tools for the Evaluation of UGT1a1 Missense Variants. *Human Mutation* **36**(12), 1215–1225 (2015)
- [2] Mueller, S.C., Backes, C., Haas, J., Katus, H.A., Meder, B., Meese, E., Keller, A.: Pathogenicity prediction of non-synonymous single nucleotide variants in dilated cardiomyopathy. *Brief Bioinform*, 054 (2015)
- [3] Luxembourg, B., D'Souza, M., Koerber, S., Seifried, E.: Prediction of the pathogenicity of antithrombin sequence variations by in silico methods. *Thromb. Res.* **135**(2), 404–409 (2015)
- [4] Grimm, D.G., Azencott, C.-A., Aicheler, F., Gieraths, U., MacArthur, D.G., Samocha, K.E., Cooper, D.N., Stenson, P.D., Daly, M.J., Smoller, J.W., Duncan, L.E., Borgwardt, K.M.: The Evaluation of Tools Used to Predict the Impact of Missense Variants Is Hindered by Two Types of Circularity. *Human Mutation* **36**(5), 513–523 (2015)
- [5] Choi, Y., Sims, G.E., Murphy, S., Miller, J.R., Chan, A.P.: Predicting the Functional Effect of Amino Acid Substitutions and Indels. *PLOS ONE* **7**(10), 46688 (2012)
- [6] Leong, I.U., Stuckey, A., Lai, D., Skinner, J.R., Love, D.R.: Assessment of the predictive accuracy of five in silico prediction tools, alone or in combination, and two metaservers to classify long QT syndrome gene mutations. *BMC Medical Genetics* **16**, 34 (2015)
- [7] Hicks, S., Wheeler, D.A., Plon, S.E., Kimmel, M.: Prediction of missense mutation functionality depends on both the algorithm and sequence alignment employed. *Hum. Mutat.* **32**(6), 661–668 (2011)
- [8] Miosge, L.A., Field, M.A., Sontani, Y., Cho, V., Johnson, S., Palkova, A., Balakishnan, B., Liang, R., Zhang, Y., Lyon, S., Beutler, B., Whittle, B., Bertram, E.M., Enders, A., Goodnow, C.C., Andrews, T.D.: Comparison of predicted and actual consequences of missense mutations. *Proc Natl Acad Sci U S A* **112**(37), 5189–5198 (2015)
- [9] Kerr, I.D., Cox, H.C., Moyes, K., Evans, B., Burdett, B.C., Kan, A.v., McElroy, H., Vail, P.J., Brown, K.L., Sumamong, D.B., Monteferrante, N.J., Hardman, K.L., Theisen, A., Mundt, E., Wenstrup, R.J., Eggington, J.M.: Assessment of in silico protein sequence analysis in the clinical classification of variants in cancer risk genes. *J Community Genet*, 1–9 (2017)
